# Supplementary material for: Tomato LysM receptor kinase 4 mediates chitin-elicited fungal resistance in both leaves and fruit
Source: PubMed Central journal article supplement (PMC10266952; doi:10.1093/hr/uhad082), 2023-04-25
Supplement: web_material_uhad082.pdf [file web_material_uhad082.pdf]

1 **Supporting Information**

2 Article title: **Tomato LysM receptor kinase 4 mediates chitin-elicited fungal resistance in**  
3 **both leaves and fruit**

4 Authors: Yingfei Ai<sup>1</sup>, Qinghong Li<sup>1</sup>, Chenying Li<sup>1</sup>, Ran Wang<sup>1</sup>, Xun Sun<sup>1</sup>, Songyu Chen<sup>1</sup>, Xin-  
5 Zhong Cai<sup>2</sup>, Xingjiang Qi<sup>3#</sup>, and Yan Liang<sup>1#</sup>

6  
7 The following Supporting Information is available for this article:

8 **Fig. S1 Phylogenetic tree of LYK family in *Arabidopsis thaliana* and *Solanum lycopersicum*.**

9 **Fig. S2 Chitin induces *SILYK4* expression.**

10 **Fig. S3 The transcript levels of *SIWRKY33* and *SIWRKY53* are lower in *slyk4* mutants than**  
11 **in the wild type after chitin treatment.**

12 **Fig. S4 Biomass of *Botrytis cinerea* in *slyk4* leaves is higher than in the wild type.**

13 **Fig. S5 *Slyk4* mutants are susceptible to *Sclerotinia sclerotiorum*.**

14 **Fig. S6 *Sicerk1* mutants impair chitin-induced immune responses in tomato leaves.**

15 **Fig. S7 Sequence alignment of the kinase domain.**

16 **Fig. S8 *SILYK4* associates with *SICERK1*.**

17 **Fig. S9 *SICERK1* expression pattern.**

18 **Fig. S10 Spatiotemporal expression pattern of *SILYK4*.**

19 **Fig. S11 *SILYK4* expression in fruit is induced by low temperature and CaCl<sub>2</sub> treatment.**

20 **Fig. S12 *SILYK4* localizes to the cell peripheral region.**

21 **Fig. S13 *SILYK4* overexpression enhances plant resistance to *Sclerotinia sclerotiorum*.**

22 **Fig. S14 *SILYK4* overexpression does not affect fruit cuticle thickness.**

23 **Table S1** Primers used in this study

24 **Table S2** Vectors used in this study

25 **Table S3** Accession number of genes mentioned in this study

26

27 **Fig. S1 Phylogenetic tree of LYK family in *Arabidopsis thaliana* and *Solanum lycopersicum*.**

28 An unrooted phylogenetic tree was constructed using the Maximum Likelihood method with the

29 MEGA 6.0 program. The full-length amino acid sequences of all lysin motif receptor-like

30 kinases (LYKs) from *A. thaliana* (At) and *S. lycopersicum* (Sl) were used for the phylogenetic

31 tree. Robustness of the topology was assessed by 1000 bootstrap replications.

32

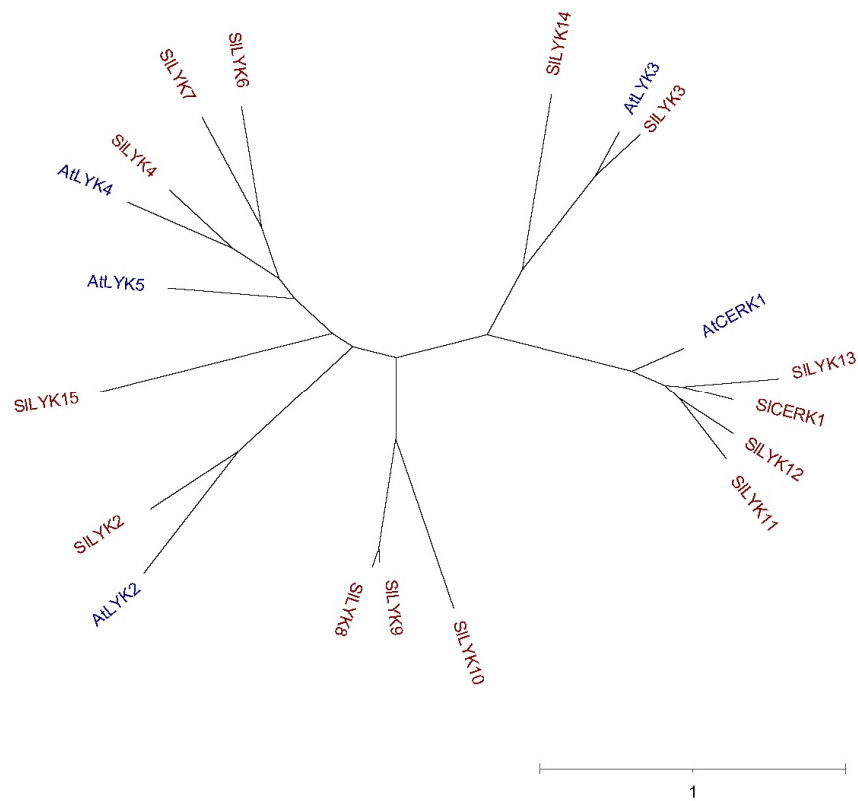

33

34

35

36 **Fig. S2 Chitin induces *SILYK4* expression.** RNA was extracted from 2-week-old tomato roots  
37 (A) and leaves (B) 30 min after treatments with H<sub>2</sub>O or chitin. The transcript levels of *SILYK4*,  
38 *SILYK6*, and *SILYK7* were detected by qRT-PCR. Data are expressed as mean  $\pm$  SD (n = 3).  
39 *SIEF1 $\alpha$*  served as the internal control. Asterisks indicate significant differences from the H<sub>2</sub>O  
40 control (\*\* $P \leq 0.01$ , Student's *t*-test). Ns stands for no significant differences.

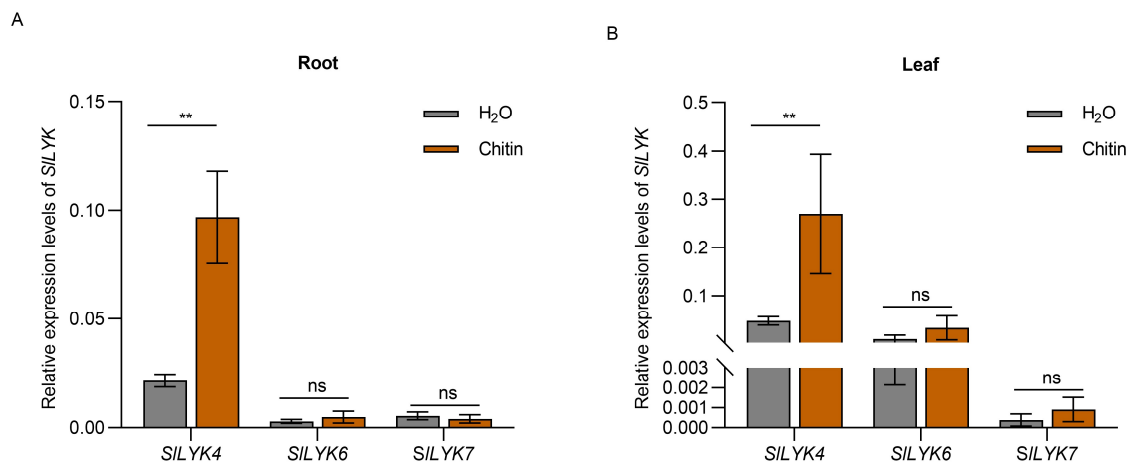

41

42

43 **Fig. S3 The transcript levels of *SIWRKY33* and *SIWRKY53* are lower in *slyk4* mutants than**  
44 **in the wild type after chitin treatment.** RNA was extracted from 2-week-old tomato leaves of  
45 wild type (WT) and *slyk4* mutants 30 min after treatments with H<sub>2</sub>O or chitin. The transcript  
46 levels of *SIWRKY33* (A) and *SIWRKY53* (B) were detected by qRT-PCR. *SIEF1α* was used as an  
47 internal control. Data are expressed as mean ± SD (n = 3). Different letters indicate significant  
48 differences between WT and *slyk4* mutants ( $P \leq 0.05$ , one-way ANOVA).

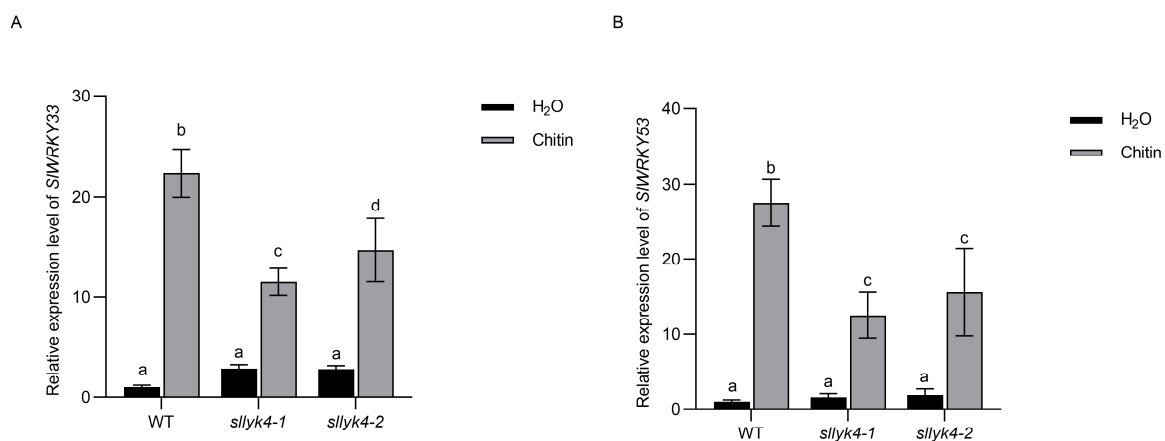

49  
50

51 **Fig. S4 Biomass of *Botrytis cinerea* in *slyk4* leaves is higher than in the wild type.** Six-week-  
52 old leaves were detached and drop-inoculated with 2.5  $\mu\text{L}$  of *B. cinerea* spore suspension  
53 **solution** ( $1 \times 10^5$  spores/mL). Biomass of *B. cinerea* was quantified by DNA-based qPCR. The  
54 plant biomass was normalized by *SLEF1a*. Data are expressed as mean  $\pm$  SD ( $n = 4$ ). Different  
55 letters indicate significant differences between wild-type (WT) and *slyk4* mutants ( $P \leq 0.05$ ,  
56 one-way ANOVA).

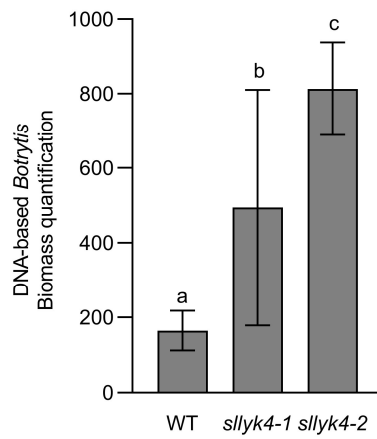

57

58

59 **Fig. S5 *Slyk4* mutants are susceptible to *Sclerotinia sclerotiorum*.** Six-week-old detached  
60 leaves were inoculated with *S. sclerotiorum* (A), and lesion areas (cm<sup>2</sup>) were calculated 36 h  
61 post-inoculation (B). Scale bars: 1 cm. Data are expressed as mean ± SE (n = 10). Different  
62 letters indicate significant differences between genotypes ( $P \leq 0.05$ , one-way ANOVA).  
63

A

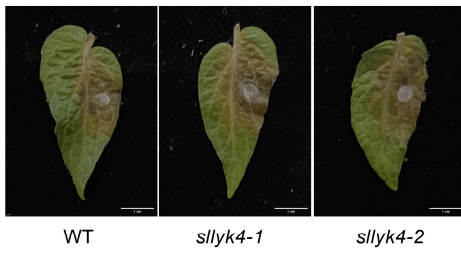

B

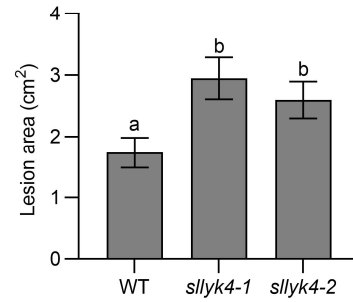

64

65

66 **Fig. S6 *Slcerk1* mutants impair chitin-induced immune responses in tomato leaves. (A)**  
67 Schematic representation of *SICERK1*. Boxes and lines represent gene exons and introns; the  
68 gRNA sequences are shown above it, and the structural feature of the protein is shown below it.  
69 LysM, LysM motif; TM, transmembrane region (237–260 amino acids). The *slcerk1-2* line has a  
70 6-bp deletion, and the *slcerk1-3* line has a 1-bp insertion. **(B)** The transcript levels of *SICERK1* in  
71 *slcerk1-2* and *slcerk1-3* mutants were lower than those in the wild type (WT). RNA was  
72 extracted from 2-week-old WT and *slcerk1* mutant leaves and roots. The transcript levels of  
73 *SICERK1* were detected by qRT-PCR. *SIEF1α* was used as an internal control. Data are  
74 presented as means ± SD from four biological replicates. Different letters indicate significant  
75 differences between WT and *slcerk1* mutants ( $P \leq 0.05$ , one-way ANOVA). **(C, D)** The *slcerk1*  
76 mutants showed reduced ROS production after chitin treatment (50 µg/mL). ROS levels were  
77 monitored using a chemiluminescence assay, and signals were recorded for 30 min. The line  
78 graphs were plotted with values recorded at 60-sec intervals (C), and the total ROS production is  
79 shown in (D). Data are presented as mean ± SE (n = 8). Different letters indicate significant  
80 differences between WT and *slcerk1* mutants ( $P \leq 0.05$ , one-way ANOVA). **(E)** The abundance  
81 of phosphorylated mitogen-activated protein kinase (MAPK). Proteins were extracted from 8-d-  
82 old tomato cotyledons at the indicated time points after treatment with 50 µg/mL chitin. MAPK  
83 phosphorylation was detected with an immunoblot analysis using an α-p42/44 **MAPK** antibody,  
84 and an α-Actin antibody served as a loading control. Band intensity was measured by Image J.  
85 Numbers on the blot indicate the relative levels of phosphorylated MAPK proteins in the mutants  
86 normalized to those in the WT. **(F-H)** The *slcerk1* mutants were susceptible to *B. cinerea*. Six-  
87 week-old tomato leaves were detached and spot-inoculated with 2.5 µL of *B. cinerea* spores ( $1 \times$   
88  $10^5$  spores/mL). Images were taken 3 d post inoculation (dpi), and representative images are  
89 shown in (F). Lesion diameter in leaves was measured (G). Data are presented as the means ±  
90 SD (n = 10). Biomass of *B. cinerea* was quantified by DNA-based qPCR (H). Data are presented  
91 as the means ± SD (n = 4). Different letters indicate significant differences between the WT and  
92 *slcerk1* mutants ( $P \leq 0.05$ , one-way ANOVA). Scale bars: 1 cm.

93

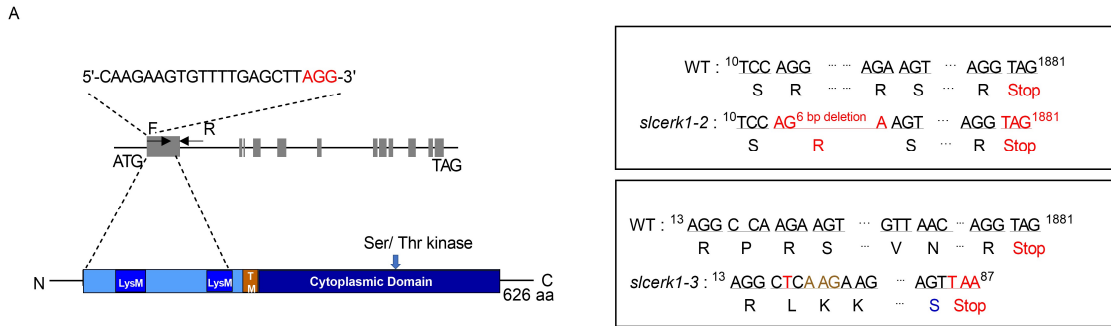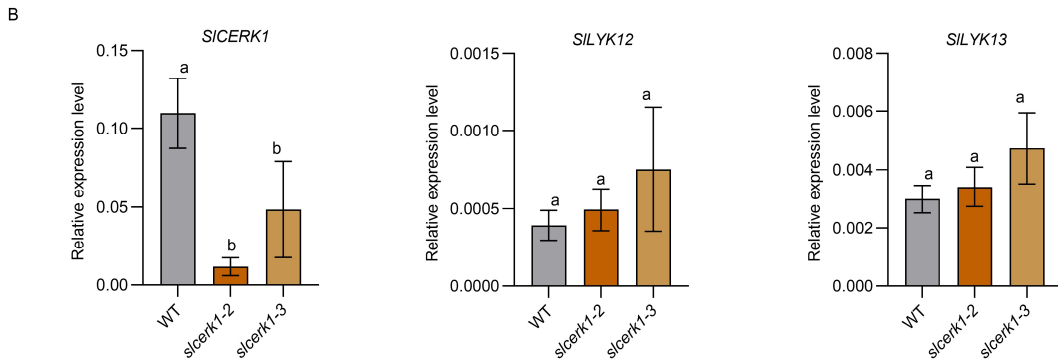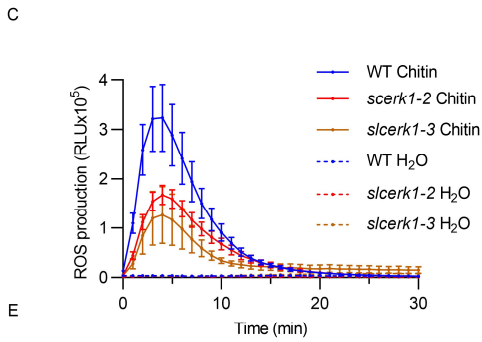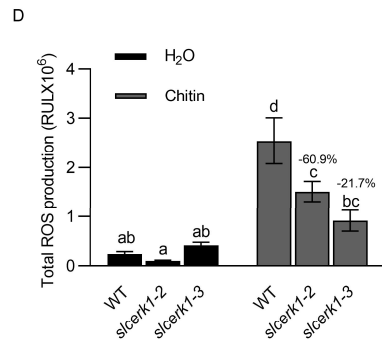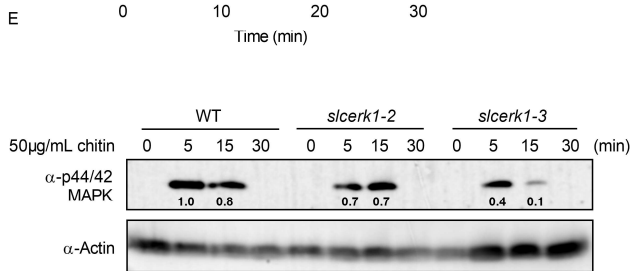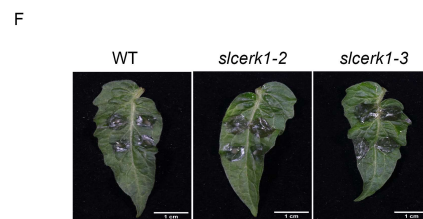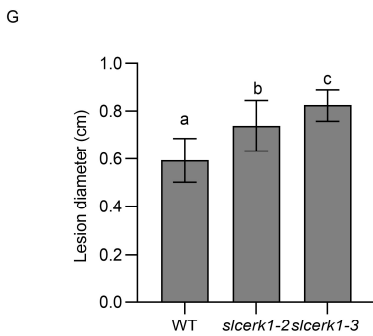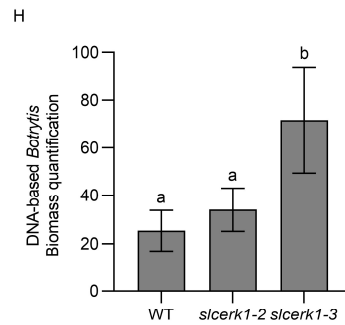



95 **Fig. S7 Sequence alignment of the kinase domain.** Multiple Sequence alignment was carried  
 96 out by ClustalW using the amino acid (aa) sequences from the intracellular domain of SILYK4,  
 97 SICERK1, AtCERK1, AtLYK4, and AtLYK5. The kinase subdomains are labeled with roman  
 98 numerals. Red boxes represent amino acids necessary for kinase activity. Fragments used for  
 99 alignment are shown as follows: SILYK4 (Solyc02g089900): 294–645 aa, SICERK1  
 100 (Solyc07g049180): 256–626 aa, AtLYK5 (At2g33580): 301–664 aa, AtLYK4 (At2g23770):  
 101 295–612 aa, AtCERK1 (At3g21630): 255–671 aa.

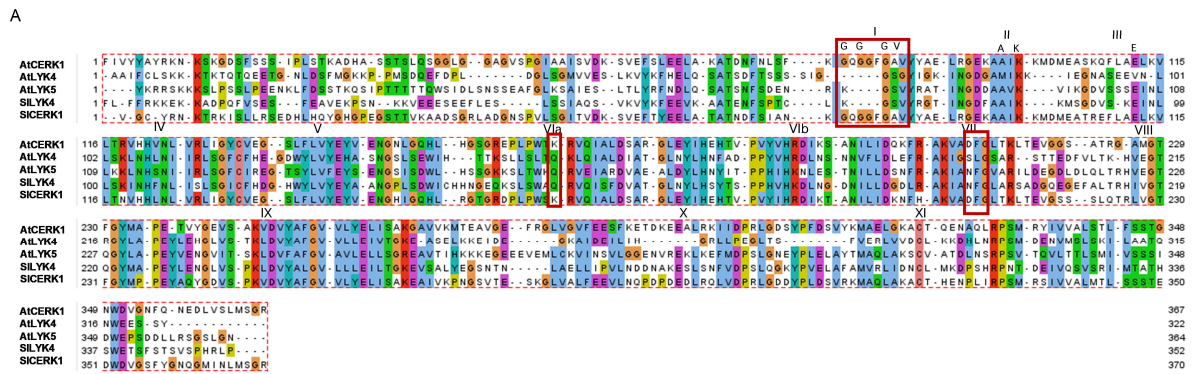

105 **Fig. S8 SILYK4 associates with SICERK1. (A)** Chitin-induced SILYK4-SICERK1 association.  
 106 HA-tagged SILYK4 and Myc-tagged SICERK1 were co-expressed in *Arabidopsis* protoplasts.  
 107 Proteins were extracted from protoplasts 15 min after treatment with or without chitin (100  
 108  $\mu\text{g}/\text{mL}$ ) and then immunoprecipitated with  $\alpha$ -HA magnetic beads. Input and co-  
 109 immunoprecipitated proteins were detected by immunoblot analysis with  $\alpha$ -HA and  $\alpha$ -Myc  
 110 antibodies. **(B)** SILYK4 interacted with SICERK1 at the plasma membrane. SILYK4-SICERK1  
 111 association was detected by a bimolecular fluorescence complementation assay. SILYK4 and  
 112 SICERK1 were fused to the N- or C-terminal portion of the yellow fluorescence protein (YFP).  
 113 The fusion proteins were co-expressed in *Arabidopsis* protoplasts. Images were obtained using a  
 114 confocal laser scanning microscope.

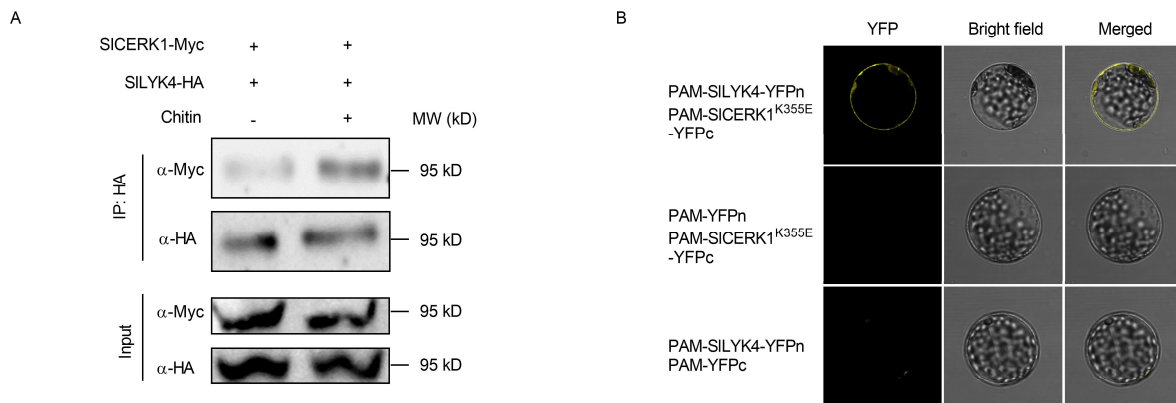

115  
 116  
 117  
 118  
 119

120 **Fig. S9 *SICERK1* expression pattern.** RNA was extracted from the root, stem, leaf, flower, and  
121 **fruit** of tomato Micro-Tom. Transcript levels of *SICERK1* were detected using qRT-PCR.  
122 *SIEF1 $\alpha$*  was used as an internal control. Data are presented as the means  $\pm$  SD (n = 3). Different  
123 letters indicate significant differences in tissues ( $P \leq 0.05$ , one-way ANOVA).

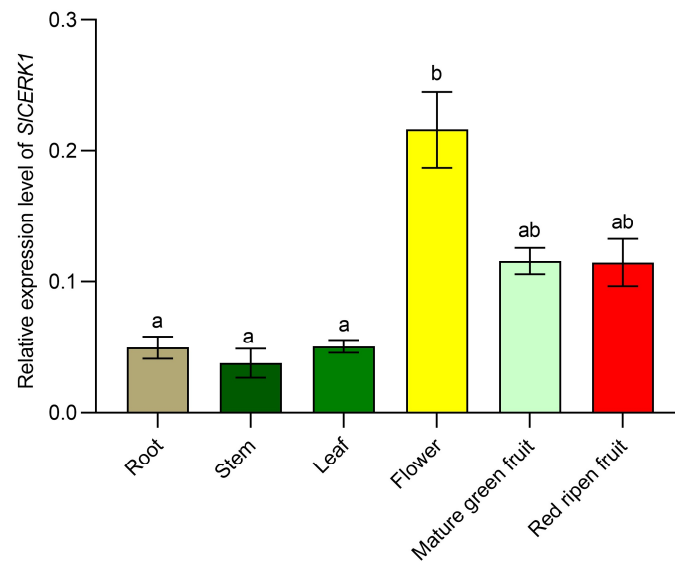

124  
125  
126

127 **Fig. S10 Spatiotemporal expression pattern of *SILYK4*.** (A) Histochemical GUS staining of  
 128 floral organs, root, stem, and leaf of *SILYK4p::GUS* transgenic tomato plants for 24 h. Scale  
 129 bars: 0.5 cm. (B) Histochemical GUS staining of 8-d-old transgenic tomato seedlings for 24 h.  
 130 Scale bars: 200  $\mu$ m. (C) Histochemical GUS staining of tomato immature green fruit, mature  
 131 green fruit, and breaker stage fruit for 8 h. Scale bars: 0.5 cm.

A

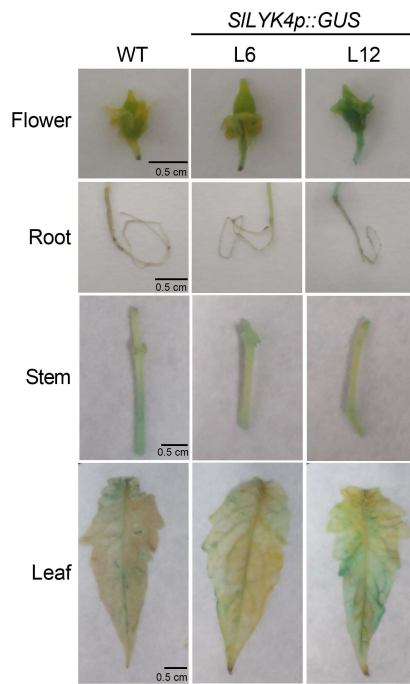

B

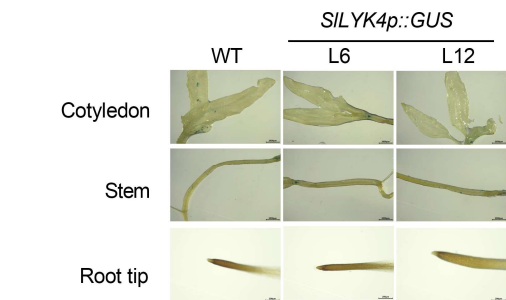

C

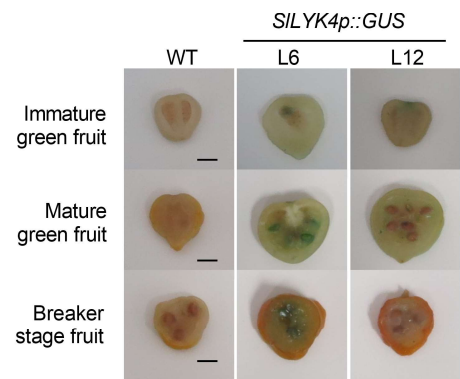

132

133

134 **Fig. S11 *SILYK4* expression in fruit is induced by low temperature and CaCl<sub>2</sub> treatment.**  
135 RNA was extracted from fruit after treatments with low temperature (A), 1% CaCl<sub>2</sub>, 2% NaCl,  
136 and 500 mM mannitol (B). The transcript level of *SILYK4* was detected by qRT-PCR. *SIACTIN7*  
137 was used as an internal control. Data are presented as means ± SD (n = 3). Asterisks indicate  
138 significant differences from the control treatment (\* $P \leq 0.05$ , Student's *t*-test). Ns stands for no  
139 significant differences.

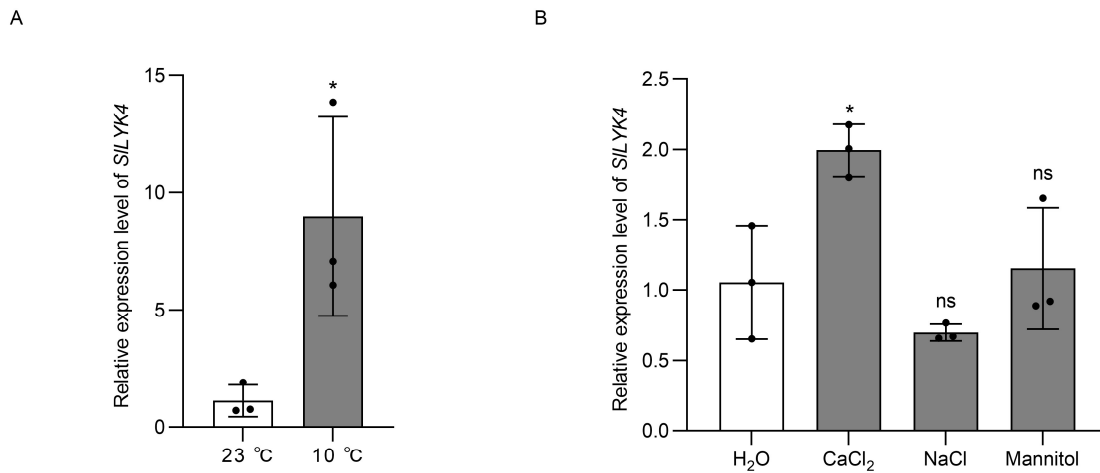

140  
141  
142

143 **Fig. S12 SILYK4 localizes to the cell peripheral region.** Two-week-old leaves from *35S::GFP*  
144 (as control) and *35S::SILYK4-GFP* transgenic lines were used to detect the subcellular  
145 localization of green fluorescent proteins. Images were obtained using a confocal laser scanning  
146 microscope. Scale bars: 10  $\mu$ m.

A

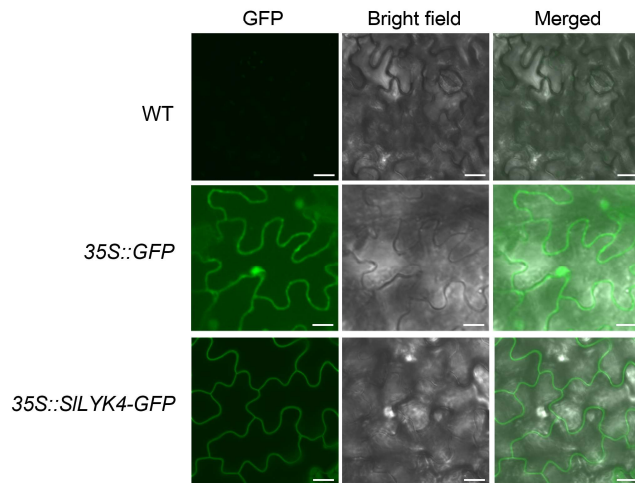

147

148

149 **Fig. S13 *SILYK4* overexpression enhances plant resistance to *Sclerotinia sclerotiorum*.** Six-  
150 week-old detached leaves were inoculated with *S. sclerotiorum* (A), and lesion areas (cm<sup>2</sup>) were  
151 calculated 36 h post-inoculation (B). Scale bars: 1 cm. Data are expressed as mean ± SE (n = 10).  
152 Different letters indicate significant differences between genotypes ( $P \leq 0.05$ , one-way ANOVA).

A

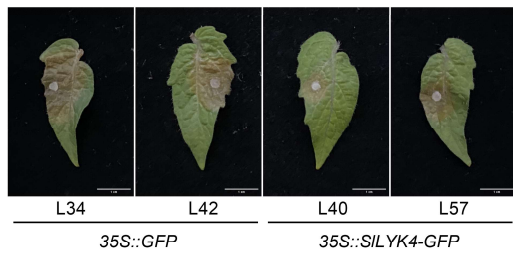

B

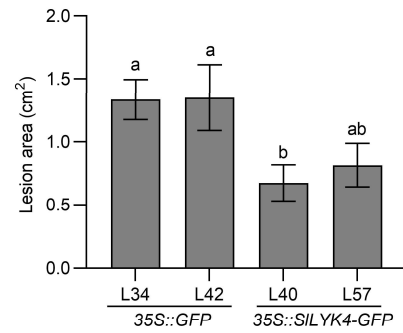

154 **Fig. S14 *SILYK4* overexpression does not affect cuticle thickness. (A)** Cuticle sections stained  
155 with Sudan IV to visualize the cutinization of epidermal cell walls in Micro-Tom (WT),  
156 *35S::GFP*, and *35S::SILYK4-GFP*. Scale bars: 25  $\mu$ m. **(B)** Quantification of the cuticle thickness  
157 of epidermal cell walls. Different letters indicate significant differences between genotypes  
158 ( $P \leq 0.05$ , one-way ANOVA).  
159

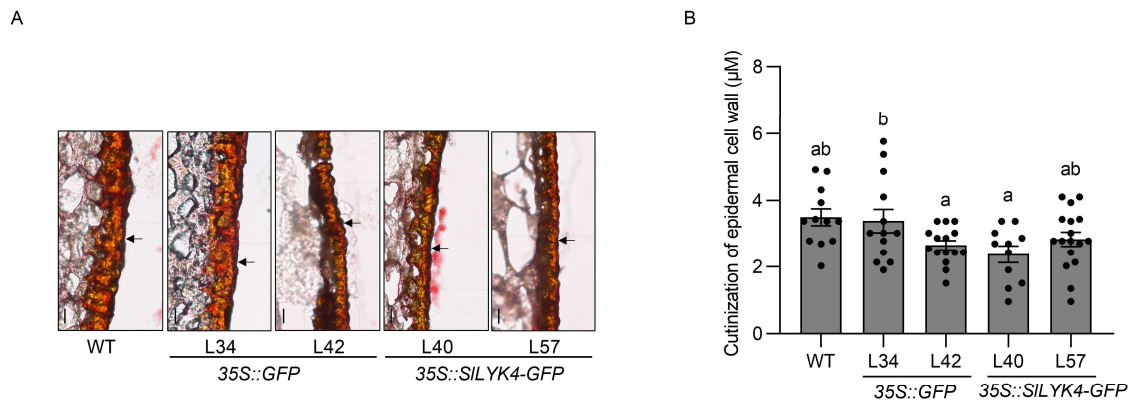

160

161



**Table S1** Primers used in this study

| <b>Primers</b>           | <b>Sequences (5'-3')</b>                                      |
|--------------------------|---------------------------------------------------------------|
| SILYK4-GW-F              | GGGGACAAGTTTGTACAAAAAAGCAGGCTACATGAATTATTCTCATCT<br>CATC      |
| SILYK4-GW-R              | GGGGACCACTTTGTACAAGAAAGCTGGGTCTGGGCAATCTATGTGGTGA<br>CA       |
| SILYK6-GW-F              | GGGGACAAGTTTGTACAAAAAAGCAGGCTACATGAATTGGCTTTTGAA<br>TATT      |
| SILYK6-GW-R              | GGGGACCACTTTGTACAAGAAAGCTGGGTCTGGTGGTACTGCAGCAGA<br>AA        |
| SILYK7-GW-F              | GGGGACAAGTTTGTACAAAAAAGCAGGCTACATGGGTGATTTTCCACT<br>TAT       |
| SILYK7-GW-R              | GGGGACCACTTTGTACAAGAAAGCTGGGTCTGGTGGTACTGCAGCAGA<br>AA        |
| SILYK4-VIGS-F            | GGGGACAAGTTTGTACAAAAAAGCAGGCTACGATGATAATGCAAAGG<br>AGAGTTTGAG |
| SILYK4-VIGS-R            | GGGGACCACTTTGTACAAGAAAGCTGGGTCTGGTGGTACTGCAGCAGA<br>AAAT      |
| SILYK6-VIGS-F            | GGGGACAAGTTTGTACAAAAAAGCAGGCTACTGAATTGGCTTTTGAAT<br>AT        |
| SILYK6-VIGS-R            | GGGGACCACTTTGTACAAGAAAGCTGGGTCCACTGGAATTATAACCTC<br>CT        |
| SILYK7-VIGS-F            | GGGGACAAGTTTGTACAAAAAAGCAGGCTACAAGCTCCGAAACAAGG<br>ACAA       |
| SILYK7-VIGS-R            | GGGGACCACTTTGTACAAGAAAGCTGGGTCTCCCTTGTCTTCTGTTCCC<br>A        |
| SILYK4 <sub>pro</sub> -F | GGGGACAAGTTTGTACAAAAAAGCAGGCTACAAATCTGCAGCCAAGAA<br>TTTTCC    |
| SILYK4 <sub>pro</sub> -R | GGGGACCACTTTGTACAAGAAAGCTGGGTCTTTCAGTTCATTAGAATCA<br>AG       |
| SIEF-qRT-F               | GGAAGTTGAGAAGGAGCCTAAG                                        |
| SIEF-qRT -R              | CAACACCAACAGCAACAGTCT                                         |
| SIACTIN7-qRT-F           | CCTCAGCACATTCCAGCAG                                           |
| SIACTIN7-qRT -R          | CCACCAAACCTTCTCCATCCC                                         |
| SILYK4-qRT-F             | CCATGGTCAGATTGATCGATAA                                        |
| SILYK4-qRT-R             | GGGCAATCTATGTGGTGACACT                                        |
| SILYK1-qRT-F             | CCAGTTAACTCCCAATGTAAC                                         |
| SILYK1-qRT-R             | CTGCTATACTGGTGGAGAACA                                         |
| SILYK6-qRT-F             | AACGTTGGCGATGACATCCT                                          |
| SILYK6-qRT-R             | TGATGGTTCAGAAGGCAGGG                                          |
| SILYK7-qRT-F             | AGTTAAGCACCTCTTGG                                             |
| SILYK7-qRT-R             | CACTGTTGGGACCTGTCT                                            |
| SILYK12-qRT-F            | TGAGGTCCATTGTTGTAG                                            |
| SILYK12-qRT-R            | GTTGAAAATGCTTGAGTG                                            |
| SILYK13-qRT-F            | AAATCAGTAGTGGTGGCT                                            |
| SILYK13-qRT-R            | CTATTACTTTGAGGAGGC                                            |
| SIWRKY33-qRT-F           | GCATTACTGTCAACCATCGC                                          |
| SIWRKY33-qRT-R           | AACTTCGCGGATTCTCACTT                                          |
| SIWRKY53-qRT-F           | CCACAACCAACATCGCCAGAGAA                                       |
| SIWRKY53-qRT-R           | ACGGTGAATAGCCGCTACCTATCA                                      |
| Bc3-F                    | GCTGTAATTTCAATGTGCAGAAATCC                                    |
| Bc3-R                    | GGAGCAACAATTAATCGCATTTC                                       |

| Vectors          | Description              | Purpose                                                                                                                                                                          | Source or reference          |
|------------------|--------------------------|----------------------------------------------------------------------------------------------------------------------------------------------------------------------------------|------------------------------|
| pGWB5            | C-terminal GFP tag       | Generation of <i>SILYK4-GFP</i> overexpression lines; <i>SICERK1<sup>K355E</sup>-GFP</i> , <i>SILYK4-GFP</i> and <i>SILYK7-GFP</i> transient expression in <i>N. benthamiana</i> |                              |
| pGWB3            | C-terminal GUS tag       | Generation of <i>SILYK4 promoter-GUS</i> transgenic lines                                                                                                                        | Nakagawa et al. <sup>1</sup> |
| pGWB14           | C-terminal 3 × HA tag    | <i>SILYK4-HA</i> transient expression in <i>N. benthamiana</i> for CoIP                                                                                                          |                              |
| pGWB17           | C-terminal 4 × Myc tag   | <i>SICERK1<sup>K355E</sup>-Myc</i> transient expression in <i>N. benthamiana</i> for CoIP                                                                                        |                              |
| pUC19-GW-Myc     | C-terminal 4 × Myc tag   | <i>SICERK1-Myc</i> transient expression in Arabidopsis protoplasts for CoIP                                                                                                      | Laboratory stock             |
| pUC19-GW-HA      | C-terminal 3 × HA tag    | <i>SILYK4-HA</i> transient expression in Arabidopsis protoplasts for CoIP                                                                                                        |                              |
| pAMPAT-YFPn/YFPc | C-terminal YFPn/YFPc tag | <i>SICERK1<sup>K355E</sup>-YFPn</i> and <i>SILYK4-YFPc</i> transient expression in Arabidopsis protoplasts for BiFC                                                              | Chen et al. <sup>2</sup>     |
| pTRV2            | TRV-based VIGS vector    | Putative <i>SILYK4</i> silencing in tomato by VIGS                                                                                                                               | Liu et al. <sup>3</sup>      |
| pDEST15          | N-terminal GST tag       | Prokaryotic expression of the cytosolic kinase domains of <i>SILYK4</i> and <i>SICERK1</i>                                                                                       | Laboratory stock             |

167

| Name           | ID                    | Other name, remark <sup>4</sup>                    |
|----------------|-----------------------|----------------------------------------------------|
| <i>SICERK1</i> | <i>Solyc07g049180</i> | <i>Bti9</i> , <i>LYK1</i> <sup>5</sup>             |
| <i>SILYK2</i>  | <i>Solyc02g094010</i> |                                                    |
| <i>SILYK3</i>  | <i>Solyc03g121050</i> |                                                    |
| <i>SILYK4</i>  | <i>Solyc02g089900</i> | Tandem duplication with <i>SILYK7</i> <sup>4</sup> |
| <i>SILYK6</i>  | <i>Solyc12g089020</i> | Kinase partly truncated                            |
| <i>SILYK7</i>  | <i>Solyc02g089920</i> | Tandem duplication with <i>SILYK4</i>              |
| <i>SILYK8</i>  | <i>Solyc09g083200</i> | Kinase truncated                                   |
| <i>SILYK9</i>  | <i>Solyc09g083210</i> | Tandem duplication with <i>SILYK9</i>              |
| <i>SILYK10</i> | <i>Solyc02g065520</i> | Tandem duplication with <i>SILYK8</i>              |
| <i>SILYK11</i> | <i>Solyc02g081040</i> | Tandem duplication with <i>SILYK12</i>             |
| <i>SILYK12</i> | <i>Solyc02g081050</i> | Tandem duplication with <i>SILYK11</i>             |
| <i>SILYK13</i> | <i>Solyc01g098410</i> |                                                    |
| <i>SILYK14</i> | <i>Solyc06g069610</i> |                                                    |

|                                |                       |
|--------------------------------|-----------------------|
| <i>SILYK15</i>                 | <i>Solyc11g069630</i> |
| <i>AtCERK1</i>                 | <i>At3g21630</i>      |
| <i>AtLYK2</i>                  | <i>At3g01840</i>      |
| <i>AtLYK3</i>                  | <i>At1g51940</i>      |
| <i>AtLYK4</i>                  | <i>At2g23770</i>      |
| <i>AtLYK5</i>                  | <i>At2g33580</i>      |
| <i>SIWRKY33</i>                | <i>Solyc09g014990</i> |
| <i>SIWRKY53</i>                | <i>Solyc08g008280</i> |
| <i>SIACTIN7</i>                | <i>Solyc03g078400</i> |
| <i>SIEF<math>\alpha</math></i> | <i>Solyc06g005060</i> |

169 The accession numbers are found from the Sol genomics network for tomato and TAIR  
170 databases for Arabidopsis.

171

- 172 1. Nakagawa, T. *et al.* Development of series of gateway binary vectors, pGWBs, for  
173 realizing efficient construction of fusion genes for plant transformation. *Journal of*  
174 *Bioscience and Bioengineering* **104**, 34-41 <http://dx.doi.org/10.1263/jbb.104.34> (2007).
- 175 2. Chen, D.Q. *et al.* S-acylation of P2K1 mediates extracellular ATP-induced immune  
176 signaling in *Arabidopsis*. *Nature Communications* **12**, 2750 2750  
177 <http://dx.doi.org/10.1038/s41467-021-22854-1> (2021).
- 178 3. Liu, Y.L., Schiff, M. & Dinesh-Kumar, S.P. Virus-induced gene silencing in tomato.  
179 *Plant Journal* **31**, 777-786 <http://dx.doi.org/10.1046/j.1365-313X.2002.01394.x> (2002).
- 180 4. Buendia, L., Wang, T., Girardin, A. & Lefebvre, B. The LysM receptor - like kinase  
181 SILYK10 regulates the arbuscular mycorrhizal symbiosis in tomato. *New Phytologist*  
182 **210**, 184-195 <http://dx.doi.org/10.1111/nph.13753> (2016).
- 183 5. Zeng, L., Velásquez, A.C., Munkvold, K.R., Zhang, J. & Martin, G.B. A tomato LysM  
184 receptor-like kinase promotes immunity and its kinase activity is inhibited by AvrPtoB.  
185 *The Plant Journal* **69**, 92-103 <http://dx.doi.org/10.1111/j.1365-313x.2011.04773.x>  
186 (2012).

187

188
